# Supplementary material
Source: PubMed Central journal article supplement (PMC6643660)
Supplement: ao7b01234_si_001.pdf [file ao7b01234_si_001.pdf]

## Planar and Cell Aggregate-Like Assemblies Consisting of Microreactors and HepG2 Cells

*Yan Zhang,<sup>#</sup> Philipp S. Schattling,<sup>#</sup> Fabian IteI,<sup>#</sup> Brigitte Städler\*<sup>#</sup>*

Dr. Yan Zhang, Dr. Philipp S. Schattling, Dr. Fabian IteI, Dr. Brigitte Städler  
Interdisciplinary Nanoscience (iNANO), Aarhus University, Gustav Wieds Vej 14, 8000, Denmark  
E-mail: bstadler@inano.au.dk

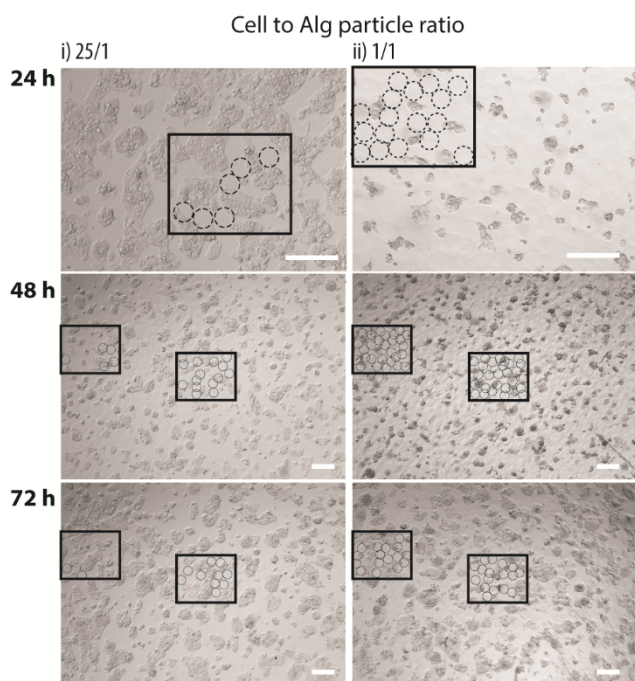

**Figure S1.** Bright field images of live co-cultured HepG2 cells and Alg particles at different number ratios (cell to Alg particle = 25/1 and 1/1) for 24 h, 48 h and 72 h. For better visualization, the particles are highlighted in selected areas of the images. The scale bars are 200  $\mu\text{m}$ .

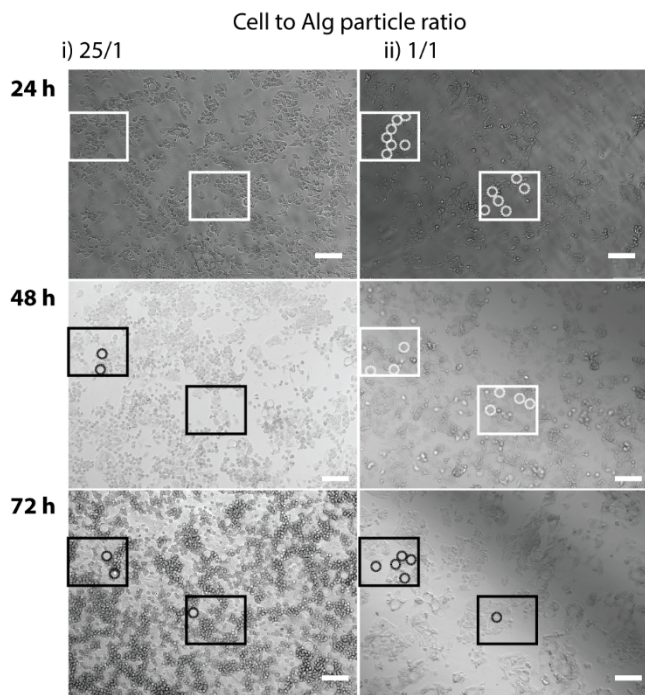

**Figure S2.** Bright field images of fixed co-cultured HepG2 cells and Alg particles at different number ratios (cell to Alg particle = 25/1 and 1/1) for 24 h, 48 h and 72 h. For better visualization, the particles are highlighted in selected areas of the images. The scale bars are 100  $\mu\text{m}$ .

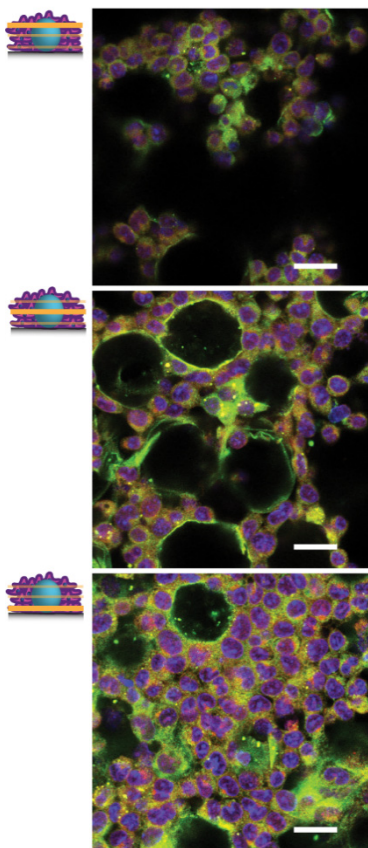

**Figure S3.** Representative CLSM images, taken at different focal planes, of uncoated Alg particles co-cultured with HepG2 cells for 72 h (cell to Alg particle = 25/1). The scale bars are 20  $\mu\text{m}$ .

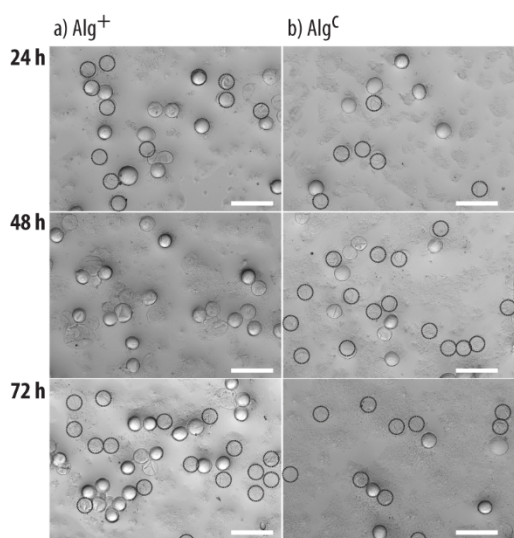

**Figure S4.** Surface coating: Bright field images of fixed co-cultures between HepG2 cells and  $\text{Alg}^+$  (a) and  $\text{Alg}^c$  (b) particles (cell to particle ratio 25/1) with different surface coatings after 24 h, 48 h and 72 h. The Alg particles are highlighted for visualization purposes. The scale bars are 200  $\mu\text{m}$ .

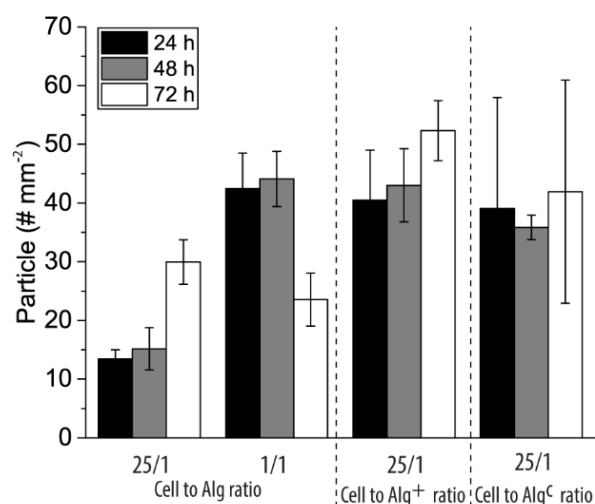

**Figure S5.** Number of particles per  $\text{mm}^2$  for different cell to particle ratios using (uncoated) Alg,  $\text{Alg}^+$  and  $\text{Alg}^c$  after 24 h, 48 h and 72 h incubation time with HepG2 cells.

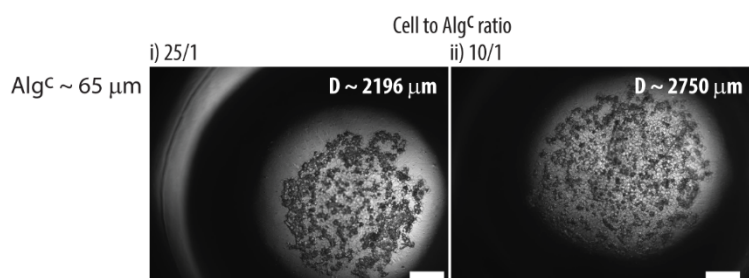

**Figure S6.** Bright field images and sizes of cell aggregates assembled from HepG2 cells and  $\sim 65 \mu\text{m}$   $\text{Alg}^c$  particles in a cell to particle ratio of 25/1 (i) or 10/1 (ii) after 24 h incubation time. The scale bars are 500  $\mu\text{m}$ .

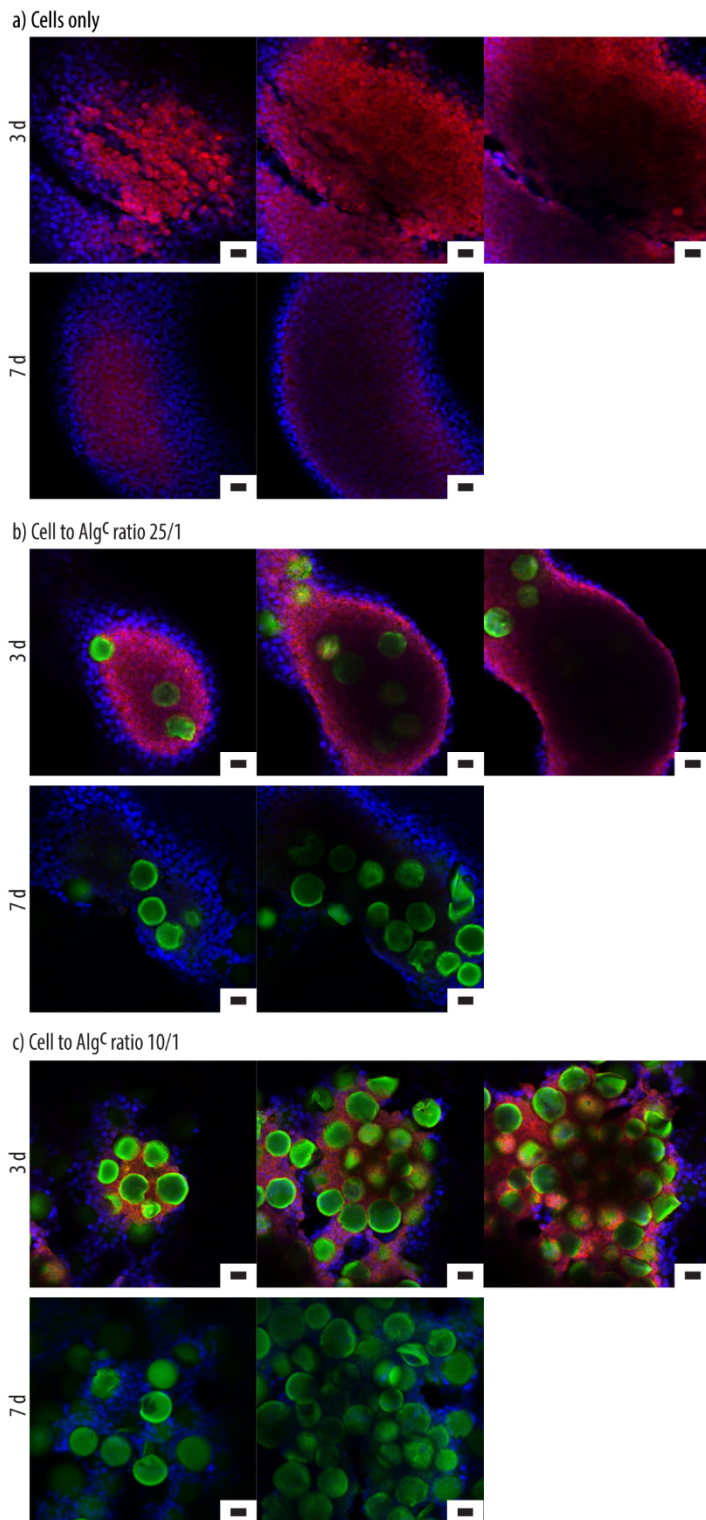

**Figure S7.** Representative CLSM images of cell aggregates only (a), aggregates containing cell and Alg<sup>c</sup> in a ratio 25/1 (b) and 10/1 (c) after 3 d (top row) and 7 d (bottom row). The images in a sequence were taken at the same x-y location in different z-planes (separation between the z-planes left to right was  $\sim 70 \mu\text{m}$ ). (Blue: DAPI stained nuclei; green: PLL<sub>F</sub> of the coated Alg<sup>c</sup>, red: phalloidin stain). The scale bars are  $20 \mu\text{m}$ .

a) Cells only

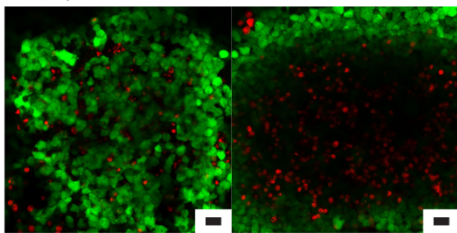

b) Cell to Alg<sup>c</sup> ratio 25/1

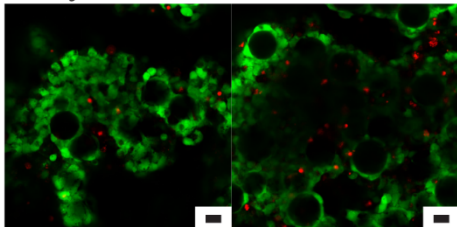

c) Cell to Alg<sup>c</sup> ratio 10/1

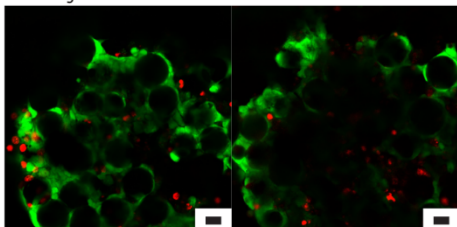

**Figure S8.** Representative CLSM images of live (green) – dead (red) stained cell aggregates assembled from HepG2 cells only (a) or HepG2 cells and Alg<sup>c</sup> in a cell to particle ratio of 25/1 (b) or 10/1 (c). Images were taken after 7 d at the same x-y location in different z-planes (separation between the z-planes left to right was  $\sim 70 \mu\text{m}$ ). The scale bars are  $20 \mu\text{m}$ .



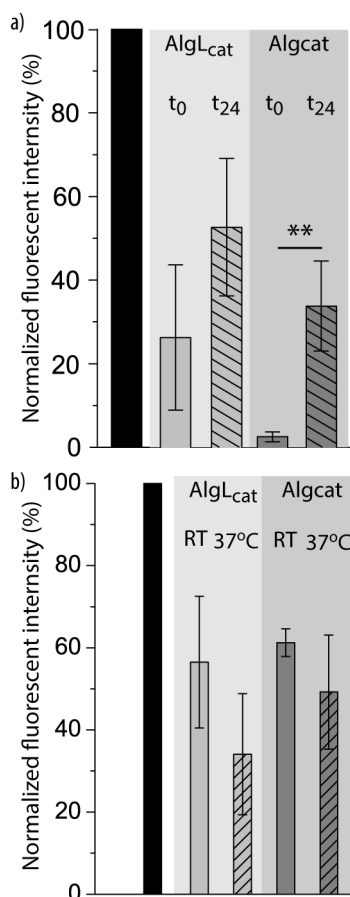

**Figure S9.** a) The normalized fluorescence intensity of a H<sub>2</sub>O<sub>2</sub>-containing solution assessed by the Amplex red assay after being exposed to AlgLcat and Algc at for 30 min at 37 °C. (40 μM H<sub>2</sub>O<sub>2</sub> starting concentration, 25000 microreactors per mL used, t<sub>0</sub>: microreactor directly after assembly, t<sub>24</sub>: microreactors after 24 h HEPES1 buffer incubation at 37°C, n = 3) b) The normalized fluorescence intensity of a H<sub>2</sub>O<sub>2</sub>-containing solution assessed by the Amplex red assay (at room temperature RT) after being exposed to AlgLcat and Algc for 30 min at room temperature or 37 °C. (40 μM H<sub>2</sub>O<sub>2</sub> starting concentration, 10000 microreactors per mL used, n = 3)

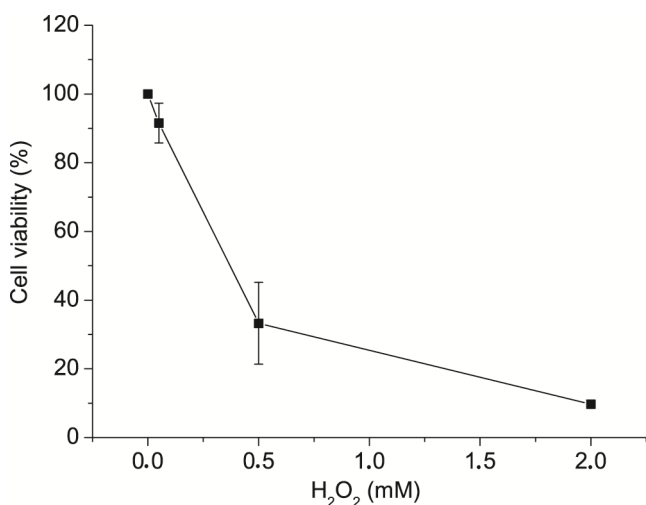

**Figure S10.** Dose response curves of HepG2 cells exposed to different concentrations of H<sub>2</sub>O<sub>2</sub> for 24 h.
